# Supplementary material for: Lagrangian process attribution of isotopic variations in near-surface water vapour in a 30-year regional climate simulation over Europe
Source: Copernicus journal article supplement (doi:10.5194/acp-2017-744), 2017-09-22
Supplement: Supplementary file 1 [file acp-2017-744-supplement.pdf]

## **SUPPORTING INFORMATION**

### **Lagrangian process attribution of isotopic variations in near-surface water vapour in a 30-year regional climate simulation over Europe**

Marina Dütsch<sup>1</sup>, Stephan Pfahl<sup>1</sup>, Miro Meyer<sup>1</sup>, Heini Wernli<sup>1</sup>

#### **Contents of this file**

- Figures S1 to S4

#### **Description**

- Figures S1 and S2 show the contributions of the processes to the monthly and yearly anomalies of  $\delta^2\text{H}$
- Figures S3 and S4 show the contributions of the processes to the monthly and yearly anomalies of deuterium excess.

---

<sup>1</sup>Institute for Atmospheric and Climate Science, ETH Zurich, Zurich, Switzerland

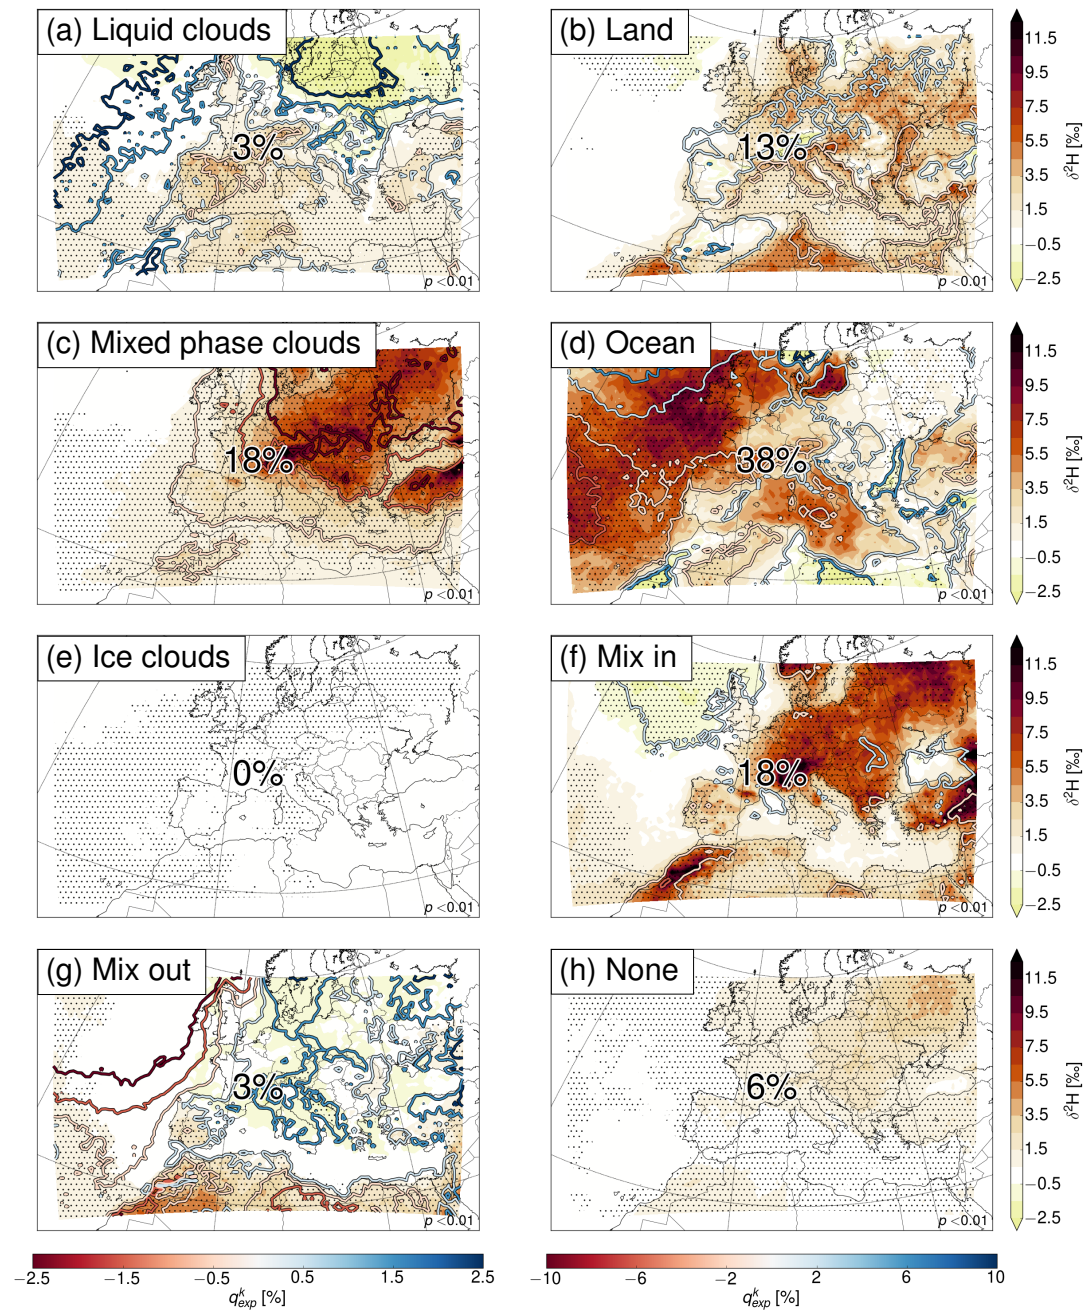

**Figure S1:** Contributions of the processes to the monthly  $\Delta\delta^2\text{H}$  in Figure 10c. The contours show the difference in  $q_{exp}^k$  (see Equations 9 and 10) between the high and low anomaly months in %. Stippling indicates areas where  $p < 0.01$ . Note the different colour scales for  $q_{exp}^k$  between the left and right hand side.

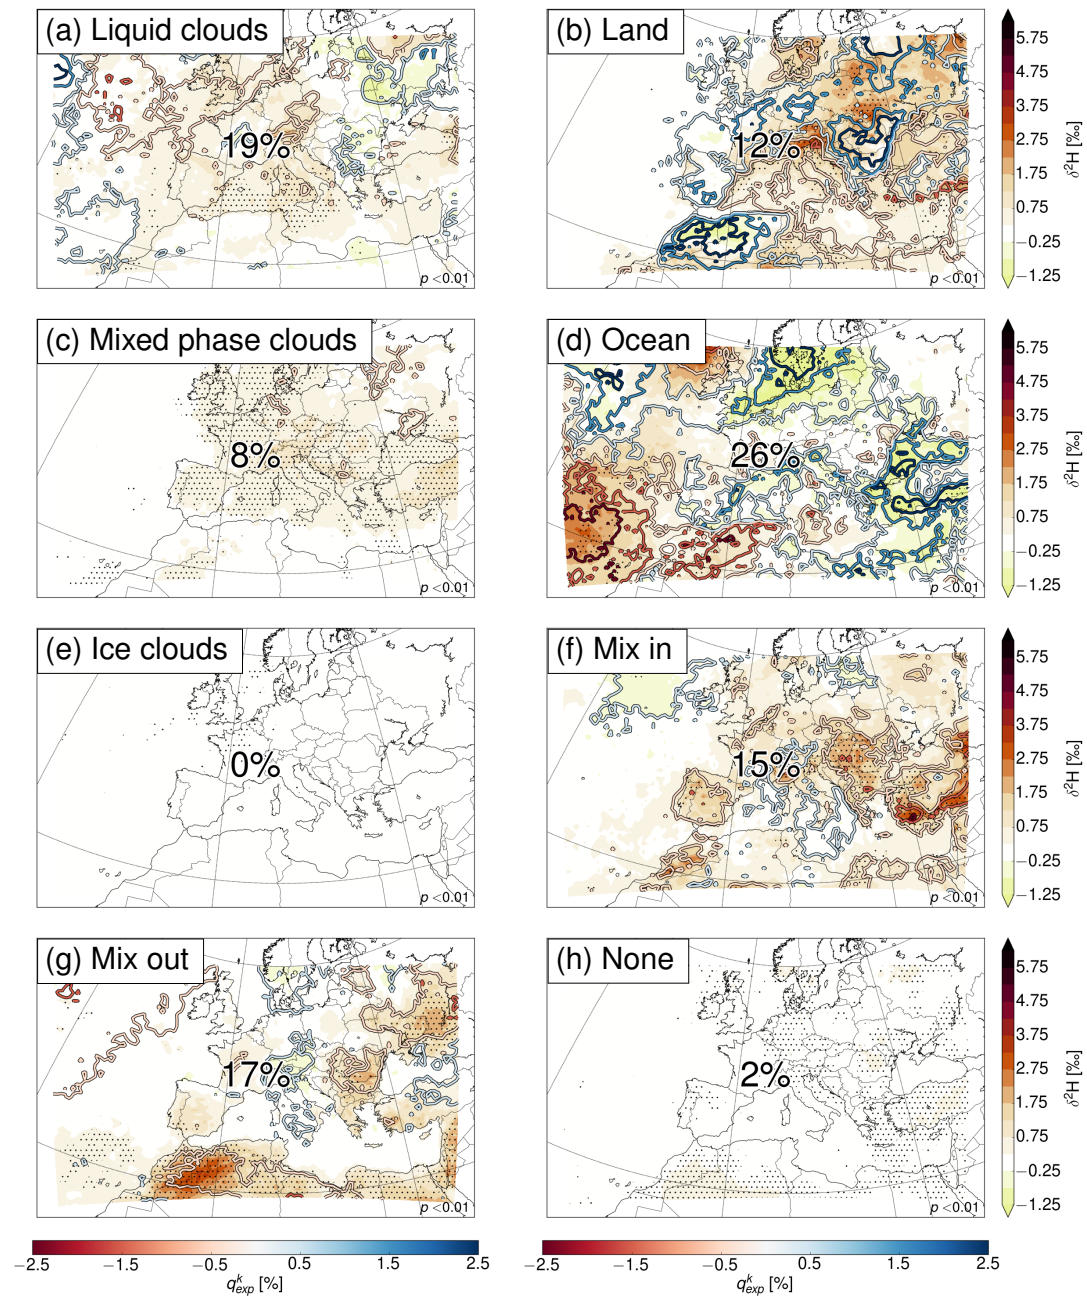

**Figure S2:** Contributions of the processes to the yearly  $\Delta\delta^2\text{H}$  in Figure 10 c. The contours show the difference in  $q_{exp}^k$  (see Equations 9 and 10) between the high and low anomaly years in %. Stippling indicates areas where  $p < 0.01$ .

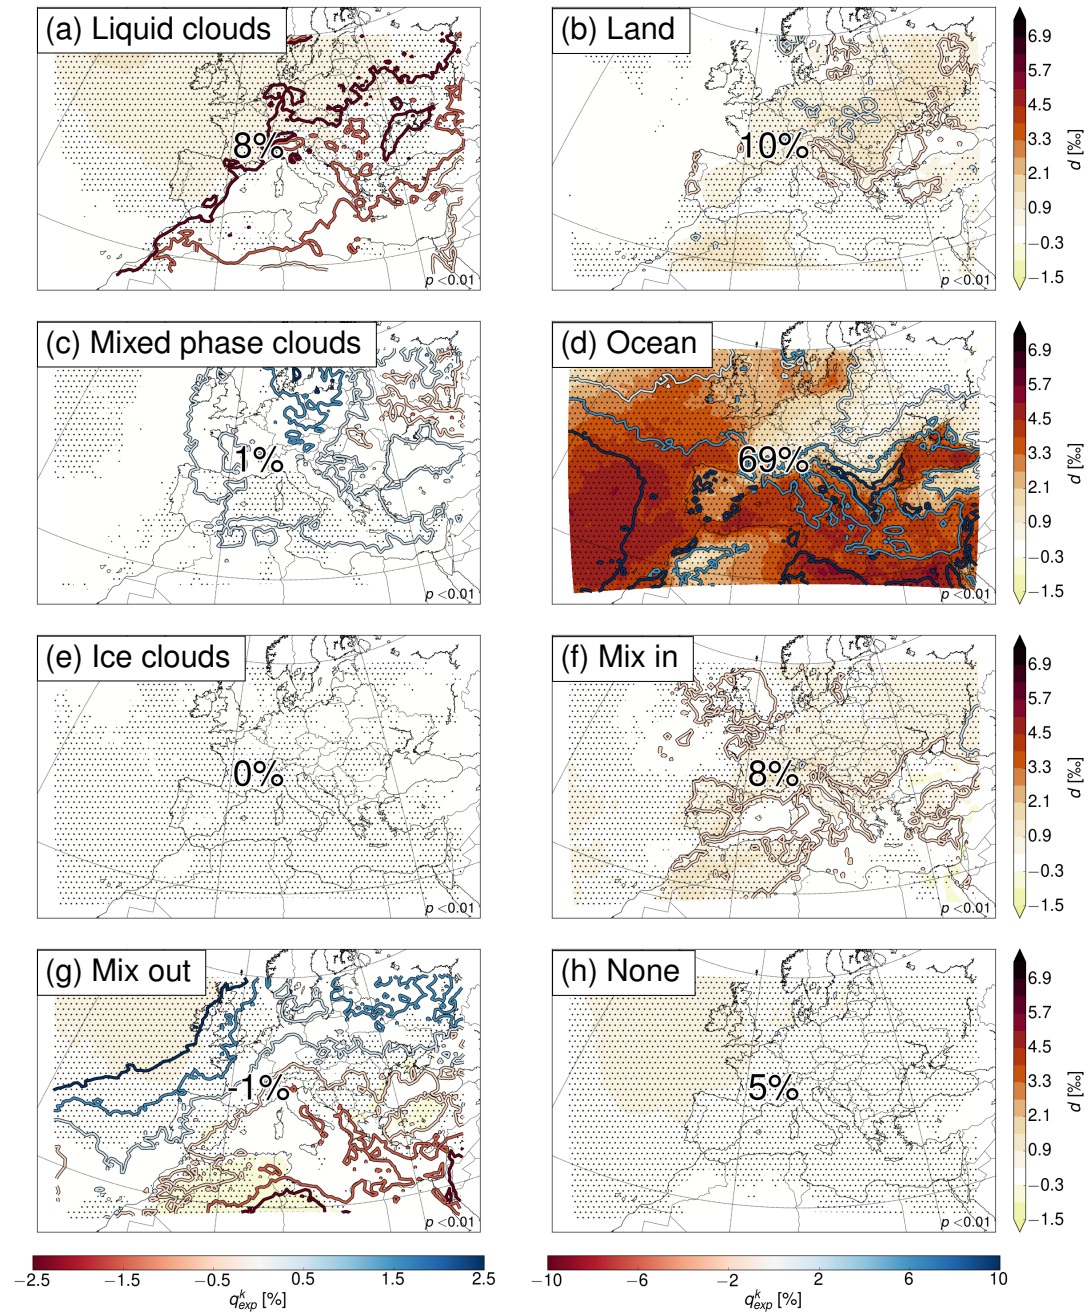

**Figure S3:** Contributions of the processes to the monthly  $\Delta d$  in Figure 12c. The contours show the difference in  $q_{exp}^k$  (see Equations 9 and 10) between the high and low anomaly months in %. Stippling indicates areas where  $p < 0.01$ . Note the different colour scales for  $q_{exp}^k$  between the left and right hand side.

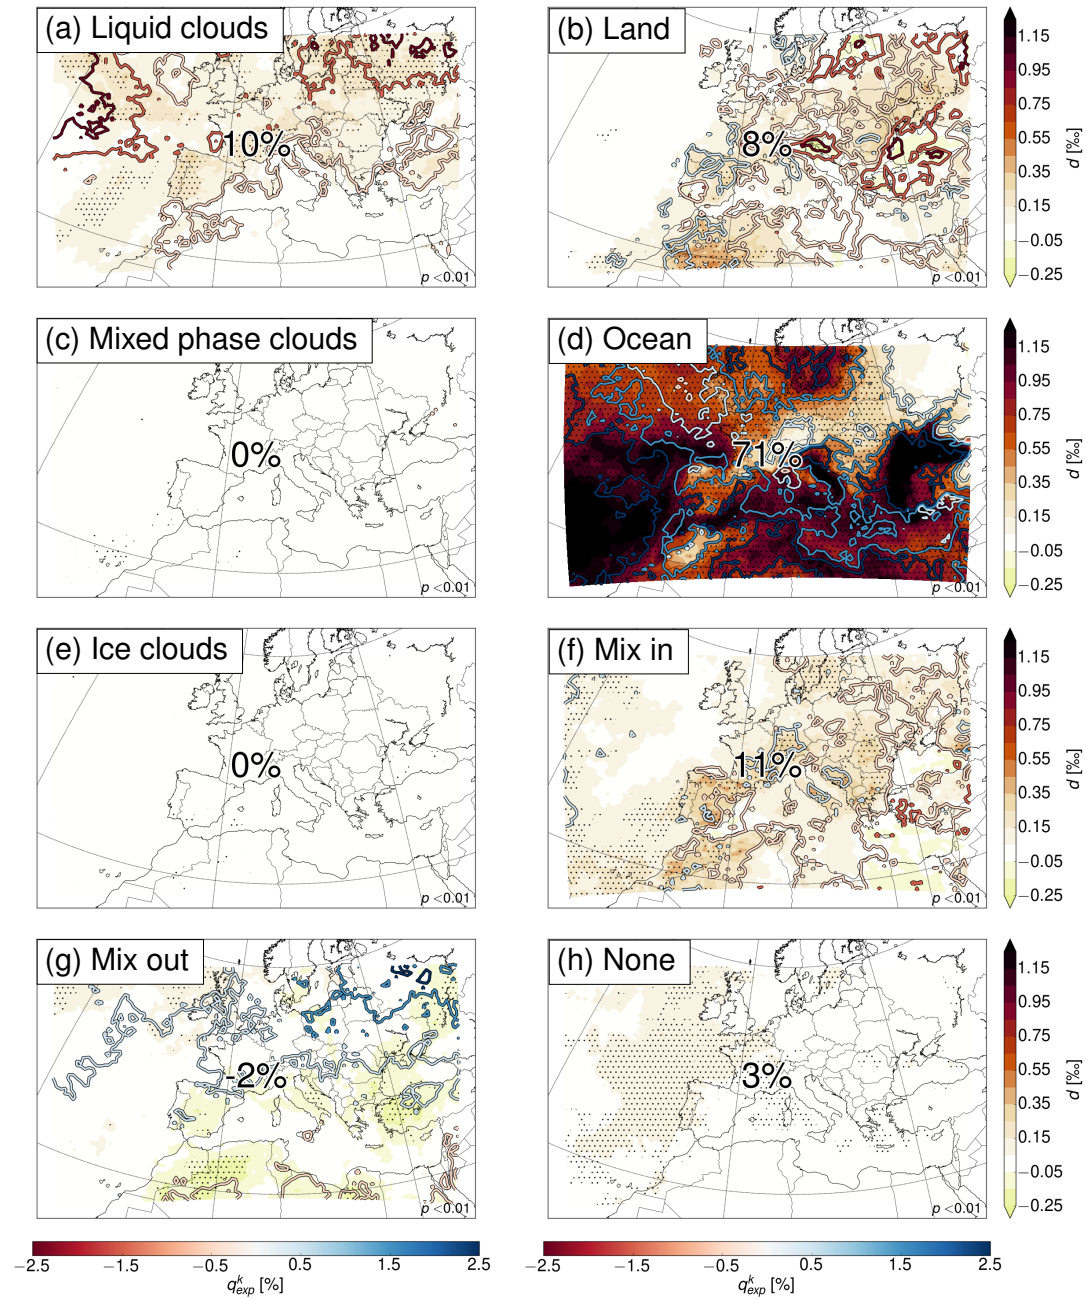

**Figure S4:** Contributions of the processes to the yearly  $\Delta d$  in Figure 12c. The contours show the difference in  $q_{exp}^k$  (see Equations 9 and 10) between the high and low anomaly years in %. Stippling indicates areas where  $p < 0.01$ .
